# Supplementary material for: HIV Capsid Protein Genetic Diversity Across HIV-1 Variants and Impact on New Capsid-Inhibitor Lenacapavir
Source: Front Microbiol. 2022 Apr 12;13:854974. doi: 10.3389/fmicb.2022.854974 (PMC9039614; doi:10.3389/fmicb.2022.854974)
Supplement: Supplementary file 1 [file Table_1.XLSX]

## Sheet: Sheet1
Table S1. p24 consensus sequences for each HIV-1 variant available in LANL.
Color code: violet, 100%; red, ≥ 90% - <100%; orange, > 75% - <90%; yellow, >50% - ≤ 75%; blue, ≤ 50%
Aa code: A, Alanine; C, Cysteine; D, Aspartic acid; E, Glutamic acid; F, Phenylalanine; G, Glycine; H, Histidine; I, Isoleucine; K, Lysine; L, Leucine; M, Methionine; N, Asparagine; P, Proline; Q, Glutamine; R, Arginine; S, Serine; T, Threonine; V, Valine; W, Tryptophan; Y, Tyrosine; ?, unknown.
The number of sequences for the consensus of each variant and groups N, O, and P is described in Table 1. Group M was inferred from its variants consensuses. HIV-1 was inferred from its groups consensuses.
Variant Position	1	2	3	4	5	6	7	8	9	10	11	12	13	14	15	16	17	18	19	20	21	22	23	24	25	26	27	28	29	30	31	32	33	34	35	36	37	38	39	40	41	42	43	44	45	46	47	48	49
HIV-1	P	I	V	Q	N	A	Q	G	Q	M	V	H	Q	P	L	S	P	R	T	L	N	A	W	V	K	A	V	E	E	K	A	F	N	P	E	I	I	P	M	F	M	A	L	S	E	G	A	T	P
Group M	P	I	V	Q	N	A	Q	G	Q	M	V	H	Q	A	I	S	P	R	T	L	N	A	W	V	K	V	V	E	E	K	A	F	S	P	E	V	I	P	M	F	S	A	L	S	E	G	A	T	P
Group N	P	L	V	Q	N	A	Q	G	Q	M	V	H	Q	P	L	T	P	R	T	L	N	A	W	V	K	V	I	E	E	K	A	F	N	P	E	V	I	P	M	F	M	A	L	S	E	G	A	T	P
Group O	P	V	V	P	N	A	Q	G	Q	M	V	H	Q	(AP)	L	S	P	R	T	L	N	A	W	V	K	A	V	E	E	K	A	F	N	P	E	I	I	P	M	F	M	A	L	S	E	G	A	I	P
Group P	P	I	V	Q	N	A	Q	G	Q	M	T	H	(LM)	P	L	S	P	R	T	L	N	A	W	V	K	A	V	E	E	K	A	F	N	P	E	I	I	P	M	F	M	A	L	S	E	G	(SA)	I	P
A	P	I	V	Q	N	A	Q	G	Q	M	I	H	Q	A	L	S	P	R	T	L	N	A	W	V	K	V	I	E	E	K	G	F	S	P	E	V	I	P	M	F	S	A	L	S	E	G	A	T	P
A1	P	I	V	Q	N	A	Q	G	Q	M	I	H	Q	A	L	S	P	R	T	L	N	A	W	V	K	V	I	E	E	K	A	F	S	P	E	V	I	P	M	F	S	A	L	S	E	G	A	T	P
A2	P	I	V	Q	N	A	Q	G	Q	M	V	H	Q	A	L	S	P	R	T	L	N	A	W	V	K	V	V	E	E	K	A	F	S	P	E	V	I	P	M	F	S	A	L	S	E	G	A	T	P
A3	P	I	V	Q	N	A	Q	G	Q	M	V	H	Q	S	L	S	P	R	T	L	N	A	W	V	K	V	I	E	E	K	A	F	S	P	E	V	I	P	M	F	S	A	L	S	E	G	A	T	P
A4	P	I	V	Q	N	A	Q	G	Q	M	V	H	Q	A	L	S	P	R	T	L	N	A	W	V	K	V	V	E	E	K	A	F	S	P	E	V	I	P	M	F	S	A	L	S	E	G	C	T	P
A6	P	I	V	Q	N	A	Q	G	Q	M	(TV)	H	Q	S	M	S	P	R	T	L	N	A	W	V	K	V	I	E	E	K	A	F	S	P	E	V	I	P	M	F	S	A	L	S	E	G	A	T	P
B	P	I	V	Q	N	L	Q	G	Q	M	V	H	Q	A	I	S	P	R	T	L	N	A	W	V	K	V	V	E	E	K	A	F	S	P	E	V	I	P	M	F	S	A	L	S	E	G	A	T	P
C	P	I	V	Q	N	L	Q	G	Q	M	V	H	Q	A	I	S	P	R	T	L	N	A	W	V	K	V	I	E	E	K	A	F	S	P	E	V	I	P	M	F	T	A	L	S	E	G	A	T	P
D	P	I	V	Q	N	L	Q	G	Q	M	V	H	Q	A	I	S	P	R	T	L	N	A	W	V	K	V	I	E	E	K	A	F	S	P	E	V	I	P	M	F	S	A	L	S	E	G	A	T	P
F	P	I	V	Q	N	L	Q	G	Q	M	V	Y	Q	T	L	S	P	R	T	L	N	A	W	V	K	V	V	E	E	K	A	F	S	P	E	V	I	P	M	F	S	A	L	S	E	G	A	T	P
F1	P	I	V	Q	N	L	Q	G	Q	M	V	H	Q	A	L	S	P	R	T	L	N	A	W	V	K	V	V	E	E	K	A	F	S	P	E	V	I	P	M	F	S	A	L	S	E	G	A	T	P
F2	P	I	V	Q	N	L	Q	G	Q	M	V	H	Q	A	L	S	P	R	T	L	N	A	W	V	K	V	I	E	E	K	A	F	S	P	E	V	I	P	M	F	S	A	L	S	E	G	A	T	P
G	P	I	V	Q	N	A	Q	G	Q	M	V	H	Q	A	I	S	P	R	T	L	N	A	W	V	K	V	V	E	E	K	A	F	S	P	E	V	I	P	M	F	S	A	L	S	E	G	A	T	P
H	P	I	V	Q	N	A	Q	G	Q	M	V	H	Q	A	I	S	P	R	T	L	N	A	W	V	K	V	V	E	E	K	A	F	S	P	E	V	I	P	M	F	S	A	L	S	E	G	A	T	P
J	P	I	V	Q	N	(LM)	Q	G	Q	P	V	H	Q	A	L	S	P	R	T	L	N	A	W	V	K	V	I	E	E	K	A	F	S	P	E	V	I	P	M	F	S	A	L	S	E	G	A	T	P
K	P	I	V	Q	N	(LM)	Q	G	Q	M	V	H	Q	(AP)	L	S	P	R	T	L	N	A	W	V	K	V	I	E	E	K	A	F	S	P	E	V	I	P	M	F	(ST)	A	L	S	E	G	A	T	P
01_AE	P	I	V	Q	N	A	Q	G	Q	M	V	H	Q	P	L	S	P	R	T	L	N	A	W	V	K	V	V	E	E	K	G	F	N	P	E	V	I	P	M	F	S	A	L	S	E	G	A	T	P
02_AG	P	I	V	Q	N	A	Q	G	Q	M	V	H	Q	S	M	S	P	R	T	L	N	A	W	V	K	V	I	E	E	K	A	F	S	P	E	V	I	P	M	F	S	A	L	S	E	G	A	T	P
03_AB	P	I	V	Q	N	A	Q	G	Q	M	I	H	Q	S	M	S	P	R	T	L	N	A	W	V	K	V	I	E	E	K	A	F	S	P	E	V	I	P	M	F	S	A	L	S	E	G	A	T	P
04_cpx	P	I	V	Q	N	A	Q	G	Q	M	V	H	Q	T	M	S	P	R	T	L	N	A	W	V	K	V	I	E	E	K	A	F	S	P	E	V	I	P	M	F	S	A	L	S	E	G	A	T	P
05_DF	P	I	V	Q	N	L	Q	G	Q	M	V	H	Q	A	L	S	P	R	T	L	N	A	W	V	K	V	I	E	E	K	A	F	S	P	E	V	I	P	M	F	S	A	L	S	E	G	A	T	P
06_cpx	P	I	V	Q	N	A	Q	G	Q	M	V	H	Q	A	(IV)	S	P	R	T	L	N	A	W	V	K	V	I	E	E	K	A	F	S	P	E	V	I	P	M	F	S	A	L	S	E	G	A	T	P
07_BC	P	I	V	Q	N	L	Q	G	Q	M	V	H	Q	P	I	S	P	R	T	L	N	A	W	V	K	V	V	E	E	K	A	F	S	P	E	V	I	P	M	F	S	A	L	S	E	G	A	T	P
08_BC	P	I	V	Q	N	L	Q	G	Q	M	V	H	Q	P	L	S	P	R	T	L	N	A	W	V	K	V	V	E	E	K	A	F	S	P	E	V	I	P	M	F	T	A	L	S	E	G	A	T	P
09_cpx	P	I	V	Q	N	A	Q	G	Q	M	V	H	Q	A	I	S	P	R	T	L	N	A	W	V	K	V	I	E	E	K	A	F	S	P	E	V	I	P	M	F	T	A	L	S	E	G	A	T	P
10_CD	P	I	V	Q	N	L	Q	G	Q	M	V	H	Q	P	L	S	P	R	T	L	N	A	W	V	K	V	I	E	E	K	A	F	S	P	E	V	I	P	M	F	S	A	L	S	E	G	A	T	P
11_cpx	P	I	V	Q	N	A	Q	G	Q	M	V	H	Q	A	I	S	P	R	T	L	N	A	W	V	K	V	V	E	E	K	A	F	S	P	E	V	I	P	M	F	S	A	L	S	E	G	A	T	P
12_BF	P	I	V	Q	N	L	Q	G	Q	M	V	H	Q	A	L	S	P	R	T	L	N	A	W	V	K	V	V	E	E	K	A	F	S	P	E	V	I	P	M	F	S	A	L	S	E	G	A	T	P
13_cpx	P	I	V	Q	N	A	Q	G	Q	M	V	H	Q	A	I	S	P	R	T	L	N	A	W	V	K	V	V	E	E	K	A	F	S	P	E	V	I	P	M	F	S	A	L	S	E	G	A	T	P
14_BG	P	I	V	Q	N	A	Q	G	Q	M	V	H	Q	A	I	S	P	R	T	L	N	A	W	V	K	V	V	E	E	K	A	F	S	P	E	V	I	P	M	F	S	A	L	S	E	G	A	T	P
15_01B	P	I	V	Q	N	A	Q	G	Q	M	V	H	Q	P	L	S	P	R	T	L	N	A	W	V	K	V	V	E	E	K	G	F	N	P	E	V	I	P	M	F	S	A	L	S	E	G	A	T	P
16_A2D	P	I	V	Q	N	A	Q	G	Q	M	V	H	Q	P	(LI)	S	P	R	T	L	N	A	W	V	K	V	V	E	E	K	A	F	S	P	E	V	I	P	M	F	(ST)	A	L	S	E	G	A	T	P
17_BF	P	I	V	Q	N	L	Q	G	Q	M	V	H	Q	S	L	S	P	R	T	L	N	A	W	V	K	V	V	E	E	K	A	F	S	P	E	V	I	P	M	F	S	A	L	S	E	G	A	T	P
18_cpx	P	I	V	Q	N	A	Q	G	Q	M	(TI)	H	Q	S	M	S	P	R	T	L	N	A	W	V	K	A	I	E	E	K	A	F	S	P	E	V	I	P	M	F	S	A	L	S	E	G	A	T	P
19_cpx	P	I	V	Q	N	L	Q	G	Q	M	V	H	Q	A	L	S	P	R	T	L	N	A	W	V	K	V	I	E	E	K	A	F	N	P	E	V	I	P	M	F	S	A	L	S	E	G	A	T	P
20_BG	P	I	V	Q	N	A	Q	G	Q	P	I	H	Q	A	I	S	P	R	T	L	N	A	W	V	K	V	V	E	E	K	A	F	S	P	E	V	I	P	M	F	S	A	L	S	E	G	A	T	P
21_A2D	P	I	V	Q	N	A	Q	G	Q	W	V	H	Q	A	I	S	P	R	T	L	N	A	W	V	K	V	V	E	E	K	A	F	N	P	E	V	I	P	M	F	S	A	L	S	E	G	A	T	P
22_01A1	P	I	V	Q	N	A	Q	G	Q	M	V	H	Q	A	L	S	P	R	T	L	N	A	W	V	K	V	V	E	E	K	G	F	N	P	E	V	I	P	M	F	S	A	L	S	E	G	A	T	P
23_BG	P	I	V	Q	N	A	Q	G	Q	P	(VI)	H	Q	A	I	S	P	R	T	L	N	A	W	V	K	V	V	E	E	K	A	F	S	P	E	V	I	P	M	F	S	A	L	S	E	G	A	T	P
24_BG	P	I	V	Q	N	A	Q	G	Q	P	I	H	Q	A	I	S	P	R	T	L	N	A	W	V	K	V	V	E	E	K	A	F	S	P	E	V	I	P	M	F	S	A	L	S	E	G	A	T	P
25_cpx	P	I	V	Q	N	A	Q	G	Q	M	V	H	Q	A	I	S	P	R	T	L	N	A	W	V	K	V	V	E	E	K	A	F	S	P	E	V	I	P	M	F	S	A	L	S	E	G	A	T	P
26_A5U	P	I	V	Q	N	A	Q	G	Q	M	V	H	Q	A	I	S	P	R	T	L	N	A	W	V	K	V	I	E	E	K	A	F	S	P	E	V	I	P	M	F	T	A	L	S	E	G	A	T	P
27_cpx	P	I	V	Q	N	A	Q	G	Q	M	V	H	Q	A	I	T	P	R	T	L	N	A	W	V	K	V	V	E	E	K	A	F	S	P	E	V	I	P	M	F	S	A	L	S	E	G	A	T	P
28_BF	P	I	V	Q	N	(IL)	Q	G	Q	M	V	H	Q	A	L	S	P	R	T	L	N	A	W	V	K	V	V	E	E	K	A	F	S	P	E	V	I	P	M	F	S	A	L	S	E	G	A	T	P
29_BF	P	I	V	Q	N	(LI)	Q	G	Q	M	V	H	Q	P	I	S	P	R	T	L	N	A	W	V	K	V	V	E	E	K	A	F	S	P	E	V	I	P	M	F	S	A	L	S	E	G	A	T	P
31_BC	P	I	V	Q	N	L	Q	G	Q	M	V	H	Q	P	I	S	P	R	T	L	N	A	W	V	K	V	V	E	E	K	A	F	S	P	E	V	I	P	M	F	T	A	L	S	E	G	A	T	P
32_06A6	P	I	V	Q	N	A	Q	G	Q	M	T	H	Q	S	I	S	P	R	T	L	N	A	W	V	K	V	I	E	E	K	A	F	S	P	E	V	I	P	M	F	S	A	L	S	E	G	A	T	P
33_01B	P	I	V	Q	N	A	Q	G	Q	M	V	H	Q	P	L	S	P	R	T	L	N	A	W	V	K	V	V	E	E	K	G	F	N	P	E	V	I	P	M	F	S	A	L	S	E	G	A	T	P
34_01B	P	I	V	Q	N	A	Q	G	Q	M	V	H	Q	P	V	S	P	R	T	L	N	A	W	V	K	V	V	E	E	K	G	F	N	P	E	V	I	P	M	F	S	A	L	S	E	G	A	T	P
35_AD	P	I	V	Q	N	A	Q	G	Q	M	I	H	Q	S	L	S	P	R	T	L	N	A	W	V	K	V	I	E	E	K	A	F	S	P	E	V	I	P	M	F	S	A	L	S	E	G	A	T	P
36_cpx	P	I	V	Q	N	A	Q	G	Q	M	V	H	Q	A	I	S	P	R	T	L	N	A	W	V	K	V	V	E	E	K	G	F	N	P	E	V	I	P	M	F	S	A	L	S	E	G	A	T	P
37_cpx	P	I	V	Q	N	A	Q	G	Q	M	T	H	Q	A	L	S	P	R	T	L	N	A	W	V	K	V	V	E	E	K	A	F	S	P	E	V	I	P	M	F	T	A	L	S	E	G	A	T	P
38_BF	P	I	V	Q	N	L	Q	G	Q	M	V	H	Q	P	L	S	P	R	T	L	N	A	W	V	K	V	I	E	E	K	A	F	S	P	E	V	I	P	M	F	S	A	L	S	E	G	A	T	P
39_BF	P	I	V	Q	N	L	Q	G	Q	M	V	H	Q	A	L	S	P	R	T	L	N	A	W	V	K	V	I	E	E	K	A	F	S	P	E	V	I	P	M	F	S	A	L	S	E	G	A	T	P
40_BF	P	I	V	Q	N	L	Q	G	Q	M	V	H	Q	A	(IL)	S	P	R	T	L	N	A	W	V	K	V	I	E	E	K	A	F	S	P	E	V	I	P	M	F	S	A	L	(AS)	E	G	A	T	P
41_CD	P	I	V	Q	N	L	Q	G	Q	M	V	H	Q	A	L	S	P	R	T	L	N	A	W	V	K	V	I	E	E	K	A	F	S	P	E	V	I	P	M	F	T	A	L	S	E	G	A	T	P
42_BF	P	I	V	Q	N	L	Q	G	Q	M	V	H	Q	A	I	S	P	R	T	L	N	A	W	V	K	V	V	E	E	K	A	F	S	P	E	V	I	P	M	F	S	A	L	A	E	G	A	T	P
43_02G	P	I	V	Q	N	A	Q	G	Q	M	V	H	Q	S	L	S	P	R	T	L	N	A	W	V	K	V	I	E	E	K	A	F	S	P	E	V	I	P	M	F	T	A	L	S	E	G	A	T	P
44_BF	P	I	V	Q	N	L	Q	G	Q	M	V	H	Q	A	L	S	P	R	T	L	N	A	W	V	K	V	V	E	E	K	A	F	S	P	E	V	I	P	M	F	S	A	L	S	E	G	A	T	P
45_cpx	P	I	V	Q	N	A	Q	G	Q	M	V	H	Q	A	I	S	P	R	T	L	N	A	W	V	K	V	I	E	E	K	A	F	S	P	E	V	I	P	M	F	T	A	L	S	E	G	A	T	P
46_BF	P	I	V	Q	N	L	Q	G	Q	M	V	H	Q	(AS)	L	S	P	R	T	L	N	A	W	V	K	V	V	E	E	K	A	F	S	P	E	V	I	P	M	F	S	A	L	S	E	G	A	T	P
47_BF	P	I	V	Q	N	A	Q	G	Q	M	(MI)	H	Q	P	I	S	P	R	T	L	N	A	W	V	K	V	V	E	E	K	A	F	S	P	E	V	I	P	M	F	S	A	L	S	E	G	C	T	P
48_01B	P	I	V	Q	N	A	Q	G	Q	M	V	H	Q	P	V	S	P	R	T	L	N	A	W	V	K	V	V	E	E	K	G	F	N	P	E	V	I	P	M	F	S	A	L	S	E	G	A	T	P
49_cpx	P	I	V	Q	N	A	Q	G	Q	M	V	H	Q	A	V	S	P	R	T	L	N	A	W	V	K	V	I	E	E	K	A	F	S	P	E	V	I	P	M	F	S	A	L	S	E	G	A	T	P
50_A1D	P	I	V	Q	N	L	Q	G	Q	M	V	H	Q	A	I	S	P	R	T	L	N	A	W	V	K	V	I	E	E	K	A	F	S	P	E	V	I	P	M	F	S	A	L	S	E	G	A	T	P
51_01B	P	I	V	Q	N	L	Q	G	Q	M	V	H	Q	A	I	S	P	R	T	L	N	A	W	V	K	V	I	E	E	K	A	F	N	P	E	V	I	P	M	F	S	A	L	S	E	G	A	T	P
52_01B	P	I	V	Q	N	A	Q	G	Q	M	V	H	Q	P	V	S	P	R	T	L	N	A	W	V	K	V	V	E	E	K	G	F	N	P	E	V	I	P	M	F	S	A	L	S	E	G	A	T	P
53_01B	P	I	V	Q	N	A	Q	G	Q	M	V	H	Q	P	L	S	P	R	T	L	N	A	W	V	K	V	V	E	E	K	G	F	N	P	E	V	I	P	M	F	S	A	L	S	E	G	A	T	P
54_01B	P	I	V	Q	N	L	Q	G	Q	M	V	H	Q	P	I	S	P	R	T	L	N	A	W	V	K	V	V	E	E	K	A	F	N	P	E	V	I	P	M	F	S	A	L	A	E	G	A	T	P
55_01B	P	I	V	Q	N	A	Q	G	Q	M	V	H	Q	P	L	S	P	R	T	L	N	A	W	V	K	V	V	E	E	K	G	F	N	P	E	V	I	P	M	F	S	A	L	S	E	G	A	T	P
56_cpx	P	I	V	Q	N	A	Q	G	Q	M	V	H	Q	S	M	S	P	R	T	L	N	A	W	V	K	V	I	E	E	K	A	F	S	P	E	V	I	P	M	F	T	A	L	S	E	G	A	T	P
57_BC	P	I	V	Q	N	L	Q	G	Q	M	V	H	Q	P	I	S	P	R	T	L	N	A	W	V	K	V	V	E	E	K	A	F	S	P	E	V	I	P	M	F	S	A	L	S	E	G	A	T	P
58_01B	P	I	V	Q	N	A	Q	G	Q	M	V	H	Q	P	(LIV)	S	P	R	T	L	N	A	W	V	K	V	V	E	E	K	G	F	N	P	E	V	I	P	M	F	S	A	L	S	E	G	A	T	P
59_01B	P	I	V	Q	N	A	Q	G	Q	M	T	H	Q	S	L	S	P	R	T	L	N	A	W	V	K	V	V	E	E	K	G	F	N	P	E	V	I	P	M	F	S	A	L	S	E	G	A	T	P
60_BC	P	I	V	Q	N	L	Q	G	Q	M	V	H	Q	P	I	S	P	R	T	L	N	A	W	V	K	V	I	E	E	K	A	F	S	P	E	V	I	P	M	F	T	A	L	S	E	G	A	T	P
61_BC	P	I	V	Q	N	L	Q	G	Q	M	V	H	Q	P	I	S	P	R	T	L	N	A	W	V	K	V	V	E	E	K	A	F	S	P	E	V	I	P	M	F	T	A	L	S	E	G	A	T	P
62_BC	P	I	V	Q	N	L	Q	G	Q	M	V	H	Q	A	I	S	P	R	T	L	N	A	W	V	K	V	I	E	E	K	A	F	S	P	E	V	I	P	M	F	T	A	L	S	E	G	A	T	P
63_02A	P	I	V	Q	N	A	Q	G	Q	M	T	H	Q	S	M	S	P	R	T	L	N	A	W	V	K	V	I	E	E	K	A	F	S	P	E	V	I	P	M	F	T	A	L	S	E	G	A	T	P
64_BC	P	I	V	Q	N	L	Q	G	Q	M	V	H	Q	P	I	S	P	R	T	L	N	A	W	V	K	V	V	E	E	K	A	F	S	P	E	V	I	P	M	F	S	A	L	S	E	G	A	T	P
65_cpx	P	I	V	Q	N	L	Q	G	Q	M	V	H	Q	P	I	S	P	R	T	L	N	A	W	V	K	V	V	E	E	K	A	F	S	P	E	V	I	P	M	F	S	A	L	S	E	G	A	T	P
66_BF1	P	I	V	Q	N	(MLI)	Q	G	Q	M	V	H	Q	A	M	S	P	R	T	L	N	A	W	V	K	V	V	E	E	K	A	F	S	P	E	V	I	P	M	F	S	A	L	S	E	G	A	T	P
67_01B	P	I	V	Q	N	A	Q	G	Q	M	V	H	Q	P	V	S	P	R	T	L	N	A	W	V	K	V	V	E	E	K	G	F	N	P	E	V	I	P	M	F	S	A	L	S	E	G	A	T	P
68_01B	P	I	V	Q	N	A	Q	G	Q	M	V	H	Q	P	V	S	P	R	T	L	N	A	W	V	K	V	V	E	E	K	G	F	N	P	E	V	I	P	M	F	S	A	L	S	E	G	A	T	P
69_01B	P	I	V	Q	N	L	Q	G	Q	M	V	H	Q	A	L	S	P	R	T	L	N	A	W	V	K	V	V	E	E	K	A	F	S	P	E	V	I	P	M	F	S	A	L	S	E	G	A	T	P
70_BF1	P	I	V	Q	N	M	Q	G	Q	M	V	H	Q	A	I	S	P	R	T	L	N	A	W	V	K	V	I	E	E	K	A	F	S	P	E	V	I	P	M	F	S	A	L	S	E	G	A	T	P
71_BF1	P	I	V	Q	N	I	Q	G	Q	M	V	H	Q	A	I	S	P	R	T	L	N	A	W	V	K	V	V	E	E	K	A	F	S	P	E	V	I	P	M	F	S	A	L	S	E	G	A	T	P
72_BF1	P	I	V	Q	N	I	Q	G	Q	M	V	H	Q	A	I	S	P	R	T	L	N	A	W	V	K	V	V	E	E	K	A	F	S	P	E	V	I	P	M	F	S	A	L	A	E	G	A	T	P
73_BG	P	I	V	Q	N	A	Q	G	Q	M	V	H	Q	A	(LI)	S	P	R	T	L	N	A	W	V	K	V	V	E	E	K	A	F	S	P	E	V	I	P	M	F	S	A	L	S	E	G	A	T	P
74_01B	P	I	V	Q	N	A	Q	G	Q	M	V	H	Q	P	L	S	P	R	T	L	N	A	W	V	K	V	V	E	E	K	G	F	N	P	E	V	I	P	M	F	S	A	L	S	E	G	A	T	P
75_BF	P	V	V	Q	N	L	Q	G	Q	M	V	H	Q	A	I	S	P	R	T	L	N	A	W	V	K	V	I	E	E	K	A	F	S	P	E	V	I	P	M	F	S	A	L	S	E	G	A	T	P
76_01B	P	I	V	Q	N	L	Q	G	Q	M	V	H	Q	A	I	S	P	R	T	L	N	A	W	V	K	V	I	E	E	K	A	F	S	P	E	V	I	P	M	F	T	A	L	S	E	G	A	T	P
77_cpx	P	I	V	Q	N	L	Q	G	Q	M	V	H	Q	P	I	S	P	R	T	L	N	A	W	V	K	V	V	E	E	K	A	F	S	P	E	V	I	P	M	F	T	A	L	S	E	G	A	T	P
78_cpx	P	I	V	Q	N	A	Q	G	Q	M	V	H	Q	P	(LVI)	S	P	R	T	L	N	A	W	V	K	V	V	E	E	K	G	F	N	P	E	V	I	P	M	F	S	A	L	S	E	G	A	T	P
79_0107	P	I	V	Q	N	A	Q	G	Q	P	I	H	Q	S	L	S	P	R	T	L	N	A	W	V	K	V	V	E	E	K	G	F	N	P	E	V	I	P	M	F	S	A	L	S	E	G	A	T	P
80_0107	P	I	V	Q	N	A	Q	G	Q	M	V	H	Q	S	L	S	P	R	T	L	N	A	W	V	K	V	V	E	E	K	G	F	N	P	E	V	I	P	M	F	S	A	L	S	E	G	A	T	P
81_cpx	P	I	V	Q	N	L	Q	G	Q	M	V	H	Q	(PA)	I	S	P	R	T	L	N	A	W	V	K	V	I	E	E	K	A	F	S	P	E	V	I	P	M	F	S	A	L	S	E	G	A	T	P
82_cpx	P	I	V	Q	N	L	Q	G	Q	M	V	H	Q	P	I	S	P	R	T	L	N	A	W	V	K	V	I	E	E	K	A	F	S	P	E	V	I	P	M	F	T	A	L	S	E	G	A	T	P
84_A1D	P	I	V	Q	N	M	Q	G	Q	M	V	H	Q	P	I	S	P	R	T	L	N	A	W	V	K	V	I	E	E	K	A	F	S	P	E	V	I	P	M	F	T	A	L	S	E	G	A	T	P
83_cpx	P	I	V	Q	N	V	Q	G	Q	M	M	H	Q	P	L	S	P	R	T	L	N	A	W	V	K	A	I	E	E	R	G	F	S	P	E	V	I	P	M	F	S	A	L	S	E	G	A	T	P
85_BC	P	I	V	Q	N	(LI)	Q	G	Q	M	V	H	Q	A	I	S	P	R	T	L	N	A	W	V	K	V	V	E	E	K	A	F	S	P	E	V	I	P	M	F	S	A	L	S	E	G	A	T	P
86_BC	P	I	V	Q	N	L	Q	G	Q	M	V	H	Q	P	I	S	P	R	T	L	N	A	W	V	K	V	V	E	E	K	A	F	S	P	E	V	I	P	M	F	T	A	L	S	E	G	A	T	P
87_cpx	P	I	V	Q	N	L	Q	G	Q	M	V	H	Q	P	I	S	P	R	T	L	N	A	W	V	K	V	I	E	E	K	A	F	S	P	E	V	I	P	M	F	T	A	L	S	E	G	A	T	P
88_BC	P	I	V	Q	N	L	Q	G	Q	M	V	H	Q	A	I	S	P	R	T	L	N	A	W	V	K	V	V	E	E	K	A	F	S	P	E	V	I	P	M	F	S	A	L	S	E	G	A	T	P
89_BF	P	V	V	Q	N	M	Q	G	Q	M	V	H	Q	P	I	S	P	R	T	L	N	A	W	V	K	V	V	E	E	K	A	F	S	P	E	V	I	P	M	F	S	A	L	S	E	G	A	T	P
90_BF1	P	I	V	Q	N	L	Q	G	Q	M	V	H	Q	A	L	S	P	R	T	L	N	A	W	V	K	V	I	E	E	K	A	F	S	P	E	V	I	P	M	F	S	A	L	S	E	G	A	T	P
92_C2U	P	I	V	Q	N	L	Q	G	Q	M	V	H	Q	A	I	S	P	R	T	L	N	A	W	V	K	V	I	E	E	K	A	F	S	P	E	V	I	P	M	F	T	A	L	S	E	G	A	T	P
93_cpx	P	I	V	Q	N	L	Q	G	Q	M	V	H	Q	P	I	S	P	R	T	L	N	A	W	V	K	V	I	E	E	K	G	F	N	P	E	V	I	P	M	F	T	A	L	S	E	G	A	T	P
95_02B	P	I	V	Q	N	A	Q	G	Q	M	V	H	Q	A	I	S	P	R	T	L	N	A	W	V	K	V	I	E	E	K	A	F	S	P	E	V	I	P	M	F	S	A	L	S	E	G	A	T	P
96_cpx	P	I	V	Q	N	L	Q	G	Q	M	V	H	Q	P	I	S	P	R	T	L	N	A	W	V	K	V	V	E	E	K	A	F	S	P	E	V	I	P	M	F	S	A	L	S	E	G	A	T	P
98_06B	P	I	V	Q	N	A	Q	G	Q	M	V	H	Q	(AS)	(VM)	S	P	R	T	L	N	A	W	V	K	V	I	E	E	(KR)	A	F	S	P	E	(VI)	I	P	M	F	S	A	L	A	D	G	A	T	P
99_BF	P	I	V	Q	N	L	Q	G	Q	M	V	H	Q	A	L	S	P	R	T	L	N	A	W	V	K	V	I	E	E	K	A	F	S	P	E	V	I	P	M	F	S	A	L	S	E	G	A	T	P
100_01C	P	I	V	Q	N	A	Q	G	Q	M	V	H	Q	P	(VIL)	S	P	R	T	L	N	A	W	V	K	V	V	E	E	K	G	F	N	P	E	V	I	P	M	F	S	A	L	S	E	G	A	T	P
101_01B	P	I	V	Q	N	A	Q	G	Q	M	V	H	Q	P	(MIV)	S	P	R	T	L	N	A	W	V	K	V	V	E	E	K	G	F	N	P	E	V	I	P	M	F	S	A	L	S	E	G	A	T	P
102_0107	P	I	V	Q	N	A	Q	G	Q	M	V	H	Q	P	V	S	P	R	?	L	N	A	W	V	K	V	V	E	E	K	G	F	N	P	E	V	I	P	M	F	S	A	L	S	E	G	A	T	P
103_01B	P	I	V	Q	N	L	Q	G	Q	M	V	H	Q	A	L	S	P	R	T	L	N	A	W	V	K	V	I	E	E	K	A	F	S	P	E	V	I	P	M	F	T	A	L	S	E	G	A	T	P
104_0107	P	I	V	Q	N	L	Q	G	Q	M	V	H	Q	P	I	S	P	R	T	L	N	A	W	V	K	V	V	E	E	K	A	F	S	P	E	V	I	P	M	F	S	A	L	S	E	G	A	T	P
105_0108	P	I	V	Q	N	L	Q	G	Q	M	V	H	Q	P	I	S	P	R	T	L	N	A	W	V	K	V	V	E	E	K	A	F	S	P	E	V	I	P	M	F	S	A	L	S	E	G	A	T	P
106_cpx	P	I	V	Q	N	L	Q	G	Q	M	V	H	Q	P	I	S	P	R	T	L	N	A	W	V	K	V	V	E	E	K	A	F	S	P	E	V	I	P	M	F	S	A	L	S	E	G	A	T	P
107_01B	P	I	V	Q	N	A	Q	G	Q	M	V	H	Q	P	V	S	P	R	T	L	N	A	W	V	K	V	V	E	E	K	G	F	N	P	E	V	I	P	M	F	S	A	L	S	E	G	A	T	P
108_BC	P	I	V	Q	N	L	Q	G	Q	M	V	H	Q	P	I	S	P	R	T	L	N	A	W	V	K	V	I	E	E	K	A	F	S	P	E	V	I	P	M	F	T	A	L	S	E	G	A	T	P
109_0107	P	I	V	Q	N	L	Q	G	Q	M	V	H	Q	P	I	S	P	R	T	L	N	A	W	V	K	V	V	E	E	K	A	F	S	P	E	V	I	P	M	F	S	A	L	S	E	G	A	T	P
112_0107	P	I	V	Q	N	A	Q	G	Q	M	T	H	Q	S	L	S	P	R	T	L	N	A	W	V	K	V	V	E	E	K	G	F	N	P	E	V	I	P	M	F	S	A	L	S	E	G	A	T	P
113_01B	P	I	V	Q	N	A	Q	G	Q	M	V	H	Q	A	V	S	P	R	T	L	N	A	W	V	K	V	V	E	E	K	G	F	N	P	E	V	I	P	M	F	S	A	L	S	E	G	A	T	P
114_01B	P	I	V	Q	N	L	Q	G	Q	M	V	H	Q	A	I	S	P	R	T	L	N	A	W	V	K	V	V	E	E	K	A	F	S	P	E	V	I	P	M	F	T	A	L	S	E	G	A	T	P
115_01C	P	I	V	Q	N	A	Q	G	V	M	V	H	Q	S	L	S	P	R	T	L	N	A	W	V	K	V	V	E	E	K	G	F	N	P	E	V	I	P	M	F	S	A	L	S	E	G	A	T	P
[truncated: 182 more columns]
