# Supplementary material for: HIV Capsid Protein Genetic Diversity Across HIV-1 Variants and Impact on New Capsid-Inhibitor Lenacapavir
Source: Front Microbiol. 2022 Apr 12;13:854974. doi: 10.3389/fmicb.2022.854974 (PMC9039614; doi:10.3389/fmicb.2022.854974)
Supplement: Supplementary file 2 [file Table_2.XLSX]

## Sheet: Sheet1
Table S3. Wu Kabat variability coefficient (V = N x k/n) along the 231 P24 residues in all 26,146 p24 LANL sequences ascribed to HIV-1 group M variants (9 subtypes, 7 sub-subtypes, 109 CRF).
N, number of sequences in the alignment, k: number of different aa at a given position, n: frequency of the most common aa at that position.
Site	V
1	10.01
2	16.265
3	13.159
4	16.137
5	15.069
6	30.317
7	11.028
8	7.007
9	15.139
10	18.344
11	13.182
12	13.459
13	15.105
14	24.69
15	27.86
16	10.232
17	10.056
18	10.041
19	10.015
20	11.014
21	16.042
22	10.009
23	10.035
24	11.015
25	9.01
26	10.118
27	19.582
28	13.043
29	12.128
30	12.22
31	12.8
32	7.006
33	17.41
34	8.005
35	10.026
36	8.275
37	9.024
38	8.009
39	10.017
40	9.012
41	17.41
42	7.009
43	9.011
44	7.327
45	10.108
46	5.016
47	8.045
48	10.108
49	7.01
50	17.84
51	10.009
52	8.052
53	11.014
54	19.629
55	8.018
56	8.021
57	10.01
58	11.115
59	8.11
60	5.005
61	8.029
62	6.005
63	6.005
64	5.017
65	6.006
66	7.007
67	9.019
68	7.328
69	8.007
70	9.01
71	15.185
72	9.152
73	7.01
74	8.01
75	5.156
76	6.008
77	9.014
78	9.113
79	9.577
80	7.07
81	9.013
82	8.014
83	17.345
84	7.006
85	6.003
86	14.584
87	11.827
88	8.014
89	7.007
90	7.008
91	22.268
92	14.678
93	8.064
94	9.044
95	10.027
96	15.29
97	5.009
98	6.372
99	7.004
100	10.116
101	6.007
102	11.03
103	7.006
104	6.01
105	6.007
106	6.009
107	10.172
108	6.014
109	10.013
110	8.209
111	12.913
112	15.192
113	5.025
114	8.006
115	9.402
116	31.837
117	8.021
118	8.158
119	7.008
120	31.401
121	11.101
122	9.012
123	9.45
124	14.598
125	8.022
126	8.009
127	7.01
128	19.052
129	9.04
130	8.008
131	11.126
132	12.345
133	9.023
134	8.037
135	9.293
136	10.971
137	8.071
138	8.01
139	11.049
140	9.011
141	6.039
142	9.007
143	7.043
144	7.01
145	5.004
146	10.118
147	6.005
148	19.577
149	10.316
150	8.005
151	10.006
152	9.022
153	8.054
154	18.013
155	5.001
156	6.013
157	8.005
158	9.01
159	8.013
160	6.068
161	9.013
162	8.023
163	8.045
164	8.006
165	8.014
166	9.015
167	12.02
168	11.015
169	16.377
170	11.305
171	13.014
172	6.012
173	8.013
174	8.011
175	9.014
176	10.011
177	9.262
178	16.295
179	12.052
180	13.186
181	7.009
182	11.017
183	16.5
184	10.106
185	9.017
186	8.01
187	14.975
188	11.076
189	11.016
190	14.063
191	10.454
192	8.011
193	13.027
194	12.935
195	9.02
196	10.01
197	9.011
198	9.012
199	11.218
200	25.099
201	12.048
202	9.008
203	17.959
204	9.324
205	14.077
206	10.028
207	23.036
208	26.352
209	11.068
210	14.183
211	10.416
212	11.032
213	11.066
214	8.024
215	13.034
216	13.151
217	10.034
218	10.023
219	12.022
220	9.016
221	13.023
222	13.032
223	10.022
224	13.022
225	28.98
226	13.03
227	13.018
228	10.014
229	12.131
230	12.011
231	15.042
