# Supplementary material for: HIV Capsid Protein Genetic Diversity Across HIV-1 Variants and Impact on New Capsid-Inhibitor Lenacapavir
Source: Front Microbiol. 2022 Apr 12;13:854974. doi: 10.3389/fmicb.2022.854974 (PMC9039614; doi:10.3389/fmicb.2022.854974)
Supplement: Supplementary file 3 [file Table_3.XLSX]

## Sheet: Sheet1
Table S3. p24 mutations affecting HIV capsid assembly, molecule binding, HIV uncoating or infectivity found in this study (Lingappa et al., 2014; Hulme et al., 2015; Yamashita et al., 2007; Koh et al., 2013; Qi et al., 2008; Ylinen et al., 2009; Saito and Yamashita, 2021; )
In red: aa changes associated with lenacapavir resistance (Bester et al., 2020; Link et al., 2020; Sun et al., 2021 )
Location	Mutation searched	Variant (total sequences)	Mutation found (rate within variant)
β-hairpin	Q4R	CRF 01_AE (3782)	0.0005
		CRF 07_BC (621)	0.0146
		CRF 08_BC (296)	0.0034
		CRF 51_01B (7)	0.42
		CRF 52_01B (3)	0.33
		Subtype B (9908)	0.0099
		Subtype C (4823)	0.0023
		Subtype D (597)	0.0102
		Sub-subtype A1 (4002)	0.0021
		Sub-subtype F1 (234)	0.0044
H1	R18G	Subtype B (9908)	0.0004
H3	L56I	Subtype B (9908)	0.0001
H4	M66I	Subtype B (9908)	0.0002
		Subtype C (4823)	0.0006
		Sub-subtype A1 (1408)	0.0007
		CRF 07_BC (621)	0.0016
	Q67H	Subtype B (9908)	0.0006
		Subtype D (597)	0.0017
		Sub-subtype A1 (1408)	0.0007
		CRF 01_AE (3782)	0.0029
	K70N	Subtype C (4823)	0.0002
		CRF 01_AE (3782)	0.0003
	E75/E76 double mutant	Subtype B (9908)	KK (0.05%)
	N74D	CRF 01_AE (3782)	0.0005
		Subtype B (9908)	0.0007
	N74S	Subtype B (9908)	0.0002
		Subtype C (4823)	0.0004
		CRF 02_AG (593)	0.0019
		CRF 45_cpx (10)	0.1
	A77V	Subtype B (9908)	0.0003
		Subtype C (4823)	0.0002
Cyp A-binding loop	G89V	CRF 02_AG (593)	0.0019
		Subtype B (9908)	0.0002
		Subtype F (30)	0.03
		Sub-subtype F1 (234)	0.0044
	P90A	CRF 01_AE (3782)	0.0003
		CRF 02_AG (593)	0.0019
		Subtype B (9908)	0.0004
		Subtype C (4823)	0.0002
		Sub-subtype A1 (1408)	0.0007
	A92E	Subtype C (4823)	0.0002
	H87Q	Group O (104)	0.0385
		CRF 01_AE (3782)	0.2315
		CRF 02_AG (539)	0.16
		CRF 03_AB (7)	1
		CRF 05_DF (7)	0.43
		CRF 06_cpx (42)	0.17
		CRF 07_BC (621)	0.0081
		CRF 08_BC (296)	0.21
		CRF 09_cpx (11)	0.09
		CRF 10_CD (3)	0.67
		CRF 11_CPX (29)	0.34
		CRF 12_BF (25)	0.1667
		CRF 13_CPX (12)	0.8333
		CRF 14_BG (15)	1
		CRF 15_01B (8)	0.25
		CRF 16_A2D (4)	0.25
		CRF 17_BF (7)	0.7143
		CRF 18_CPX (8)	0.75
		CRF 19_CPX (5)	0.2
		CRF 20_BG (4)	1
		CRF 21_A2D (3)	0.3333
		CRF 22_01A1 (22)	0.1364
		CRF 23_BG (2)	1
		CRF 24_BG (11)	1
		CRF 25_CPX (5)	1
		CRF 26_A5U (4)	0.5
		CRF 27_cpx (5)	1
		CRF 31_BC (3)	0.3333
		CRF 32_06A6 (5)	0.8
		CRF 33_01B (18)	0.0588
		CRF 34_01B (3)	0.3333
		CRF 35_AD (23)	0.4091
		CRF 36_CPX (4)	0.25
		CRF 38_BF (5)	0.2
		CRF 41_CD (3)	1
		CRF 42_BF (17)	0.5
		CRF 43_02G (7)	1
		CRF 45_cpx (10)	0.3
		CRF 49_cpx (9)	0.1111
		CRF 53_01B (4)	0.25
		CRF 55_01B (22)	0.0455
		CRF 57_BC (13)	0.3077
		CRF 58_01B (6)	0.1667
		CRF 60_BC (8)	0.875
		CRF 61_BC (4)	1
		CRF 63_02A (13)	0.1538
		CRF 65_cpx (17)	0.0588
		CRF 67_01B (4)	0.75
		CRF 68_01B (3)	1
		CRF 70_BF1 (5)	0.6
		CRF 71_BF1 (16)	0.4375
		CRF 72_BF1 (6)	0.5
		CRF 73_BG (2)	1
		CRF 76_01B (2)	1
		CRF 82_cpx (6)	0.8
		CRF 83_cpx (11)	1
		CRF 84_A1D (3)	1
		CRF 90_BF1 (11)	0.1818
		CRF 92_C2U (5)	0.4
		CRF 93_cpx (3)	0.3333
		CRF 101_01B (3)	0.3333
		CRF 103_01B (4)	0.5
		CRF 112_0107 (3)	0.6667
		Sub-subtype A1 (1408)	0.2449
		Sub-subtype A2 (71)	0.3803
		Sub-subtype A3 (17)	0.1176
		Sub-subtype A6 (191)	1
		Sub-subtype F1 (234)	0.2261
		Sub-subtype F2 (31)	0.6129
		Subtype A (61)	0.3103
		Subtype B (9908)	0.2226
		Subtype C (4823)	0.1505
		Subtype D (597)	0.235
		Subtype F (30)	1
		Subtype G (176)	0.9943
		Subtype H (15)	0.2
		Subtype K (4)	0.25
H5	R100/S102 double mutant	CRF 07_BC (621)	TR (0.16%)
		Subtype C (4823)	QK (0.02%), TN (0.02%), TR (0.08%)
		Group P (4)	TG (100%)
	T107/T108 double mutant	CRF 01_AE (3782)	NS (0.02%)
		CRF 02_AG (593)	LP (0.18%)
		CRF 03_AB (7)	SS (14%)
		CRF 08_BC (296)	II (0.33%)
		Subtype B (9908)	PP (0.01%), SI (0.02%)
H6	T110/Q112 double mutant	CRF 01_AE (3782)	NA (0.31%), NH (0.05%), NP (0.08%)
		CRF 02_AG (593)	NE (0.18%)
		CRF 07_BC (621)	NA (0.16%), NH (0.16%), NS (0.16%)
		CRF 08_BC (296)	SM (0.34%)
		CRF 12_BF (25)	NN (4%)
		CRF 71_BF1 (16)	NH (6%)
		Subtype B (9908)	NA (0.05%), NS (0.01%), SL (0.01%)
		Subtype C (4823)	IL (0.02%), NA (0.25%), NG (0.02%), NP (0.02%), NS (0.04%), NT (0.04%), SA (0.04%), SP (0.02%)
		Subtype D (597)	NA (0.51%)
		Sub-subtype F1 (234)	SA (0.43%)
		Subtype G (176)	NA (1%)
		Group N (11)	NA (10%)
		Group O (104)	NA (1.92%), NI (0.96%), NL (0.96%), NM (0.96%), NR (0.96%)
		Group P (4)	NQ (25%)
	G116A	Group N (11)	0.73
		Group O (104)	0.0192
		CRF 01_AE (3782)	0.1351
		CRF 02_AG (539)	0.0649
		CRF 05_DF (7)	0.8571
		CRF 06_cpx (42)	0.0488
		CRF 07_BC (621)	0.8919
		CRF 08_BC (296)	0.1791
		CRF 09_cpx (11)	0.6364
		CRF 11_CPX (29)	0.2414
		CRF 13_CPX (12)	0.25
		CRF 19_CPX (5)	0.8
		CRF 20_BG (4)	0.25
		CRF 21_A2D (3)	1
		CRF 22_01A1 (22)	0.2273
		CRF 26_A5U (4)	0.25
		CRF 27_cpx (5)	0.6
		CRF 28_BF (5)	0.2
		CRF 31_BC (3)	0.6667
		CRF 33_01B (18)	0.5
		CRF 35_AD (23)	0.9565
		CRF 36_CPX (4)	1
		CRF 37_cpx (5)	0.2
		CRF 39_BF (3)	0.3333
		CRF 43_02G (7)	0.2857
		CRF 53_01B (4)	0.5
		CRF 55_01B (22)	0.0909
		CRF 57_BC (13)	0.0769
		CRF 60_BC (8)	1
		CRF 61_BC (4)	0.5
		CRF 62_BC (3)	1
		CRF 64_BC (9)	1
		CRF 65_cpx (17)	1
		CRF 67_01B (4)	0.75
		CRF 68_01B (3)	1
		CRF 77_cpx (4)	1
		CRF 82_cpx (6)	0.1667
		CRF 85_BC (12)	0.9167
		CRF 86_BC (3)	1
		CRF 87_cpx (4)	1
		CRF 88_BC (3)	0.6667
		CRF 90_BF1 (11)	0.0909
		CRF 92_C2U (5)	1
		CRF 93_cpx (3)	1
		CRF 96_cpx (4)	1
		CRF 101_01B (3)	0.3333
		CRF 103_01B (4)	1
		CRF 105_0108 (5)	1
		CRF 106_cpx (6)	1
		CRF 108_BC (5)	1
		CRF 109_0107 (2)	1
		CRF 113_01B (4)	1
		Sub-subtype A1 (1408)	0.1817
		Sub-subtype A2 (71)	0.0141
		Sub-subtype A3 (17)	0.0588
		Sub-subtype A6 (191)	0.1497
		Sub-subtype F1 (234)	0.0043
		Sub-subtype F2 (31)	0.9355
		Subtype A (61)	0.339
		Subtype B (9908)	0.3134
		Subtype C (4823)	0.8044
		Subtype D (597)	0.3506
		Subtype G (176)	0.1943
		Subtype H (15)	0.9333
		Subtype J (7)	0.4286
		Subtype K (4)	0.5
NTD	P45A	Subtype C (4823)	0.0004
	G94D	CRF 07_BC (621)	0.0032
		CRF 08_BC (296)	0.0034
		Subtype B (9908)	0.0003
		Subtype C (4823)	0.0002
MHR	K158	CRF 01_AE (3782)	E (0.02%), I (0.02%), R (0.05%), T (0.05%)
		CRF 07_BC (621)	R (0.16%)
		CRF 08_BC (296)	M (0.33%)
		Sub-subtype A2 (71)	R (1.4%)
		Subtype B (9908)	E (0.01%), M (0.01%), R (0.01%), T (0.02%)
		Subtype C (4823)	R (0.04%)
		Subtype D (597)	R (0.5%), Y (0.17%)
		Subtype K (4)	Q (25%)
		Group O (104)	E (0.9%)
H9	V181/K182 double mutant	Subtype B (9908)	AR (0.02%), ER (0.01%), LS (0.01%)
		Subtype C (4823)	AR (0.02%)
	W184/M185 double mutant	CRF 01_AE (3782)	RT (0.02%)
		CRF 08_BC (296)	CT (0.33%)
		Subtype B (9908)	FL (0.01%), GI (0.01%), GQ (0.01%), LI (0.01%), QI (0.01%), RK (0.01%), RL (0.01%), RT (0.01%)
		Subtype C (4823)	QI (0.02%)
	L189/L190 double mutant	Subtype B (9908)	GG (0.01%), QQ (0.01%), DG (0.01%), WM (0.02%)
		Subtype C (4823)	VV (0.02%), WM (0.02%)
		Subtype D (597)	WW (0.2%)
	K182R	CRF 01_AE (3782)	0.0008
		Sub-subtype A1 (1408)	0.0007
		Sub-subtype F1 (234)	0.0043
		Subtype B (9908)	0.0004
		Subtype C (4823)	0.0002
H10	D197	CRF 01_AE (3782)	A (0.05%), E (0.02%), G (0.05%), S (0.02%), Y (0.02%)
		CRF 08_BC (296)	A (0.33%)
		Sub-subtype A1 (1408)	G (0.33%)
		Subtype B (9908)	E (0.07%), H (0.01%), N (0.01%), S (0.01%), T (0.01%)
		Subtype C (4823)	E (0.02%), G (0.02%), N (0.04%)
		Subtype D (597)	G (0.16%), H (0.16%), N (0.33%)
CTD	P224	CRF 01_AE (3782)	L (0.02%), R (0.02%), T (0.02%)
		CRF 08_BC (296)	K (0.33%), R (0.67%), T (0.33%)
		CRF 49_cpx (9)	L (11%)
		Subtype B (9908)	A (0.02%), F (0.01%), G (0.01%), H (0.03%), K (0.01%), L (0.08%), N (0.01%), S (0.02%), T (0.03%)
		Subtype C (4823)	E (0.03%), L (0.02%)
		Subtype D (597)	T (0.01%)
		Sub-subtype F1 (234)	L (0.4%)
		Subtype J (7)	S (14%)
